# Supplementary material
Source: HighWire-hosted journal article supplement (https://jcp.bmj.com/highwire/filestream/197587/field_highwire_adjunct_files/0/jcp-2022-208721supp001_data_supplement.pdf)
Supplement: jcp-2022-208721supp001_data_supplement.pdf [file jcp-2022-208721supp001_data_supplement.pdf]

**Supplementary Table 1: Comparison of NDBE biopsy and index biopsy with advanced neoplasia in BE-Progressor cohort (N=53)**

| <b>P53 staining parameters</b>                                                 | <b>NDBE biopsy<br/>(n=53)</b> | <b>Advanced neoplasia<br/>(HGD/EAC) biopsy<br/>(N=42)*</b> | <b>p value</b> |
|--------------------------------------------------------------------------------|-------------------------------|------------------------------------------------------------|----------------|
| <b>Number of 3+ p53 positive columnar cells<br/>(Mean ± SD, Median, Range)</b> | 172.3 ± 513.1, 7, 0-2784      | 15155 ± 58407, 3005, 21-375452                             | <0.001         |
| <b>3+ positive p53 columnar cells</b>                                          |                               |                                                            |                |
| < 10 cells                                                                     | 32 (60%)                      | 0                                                          | <0.001         |
| ≥ 10 cells                                                                     | 21 (40%)                      | 42 (100%)                                                  |                |
| <b>Number of 3+ p53 positive glands<br/>(Mean ± SD, Median, Range)</b>         | 8.1 ± 29.4, 0, 0-200          | 210.6 ± 321.7, 50, 0-1000                                  | <0.001         |
| <b>≥ 1 3+ p53 positive glands</b>                                              | 16 (30%)                      | 41 (98%)                                                   | <0.001         |
| <b>3+ p53 positive surface epithelium</b>                                      | 4 (8%)                        | 37 (88%)                                                   | <0.001         |
| <b>2+ p53 positive columnar cells<br/>(Mean ± SD, Median, Range)</b>           | 596.7 ± 903.9, 327, 0-4999    | 19547 ± 85407, 2275, 364-623709                            | <0.000         |
| <b>2+ p53 positive columnar cells</b>                                          |                               |                                                            |                |
| < 150 cells                                                                    | 15 (28%)                      | 0                                                          | <0.001         |
| ≥ 150 cells                                                                    | 38 (72%)                      | 42 (100%)                                                  |                |

Mean duration between NDBE biopsy (most proximate to the dysplastic biopsy) and the index biopsy with dysplasia was 3.8 years

NDBE= Non-dysplastic Barrett's esophagus, HGD= High grade dysplasia, EAC= esophageal adenocarcinoma

\*The 11 biopsies with a null p53 phenotype were not included in this analysis

**Supplementary Table 2a: Specificity and sensitivity of p53 immunohistochemistry in NDBE biopsies from patients with short segment BE**

| p53 staining parameters                                                                                                                     | Cut-off points     | BE-non-progressor vs progressor |             |      |     |
|---------------------------------------------------------------------------------------------------------------------------------------------|--------------------|---------------------------------|-------------|------|-----|
|                                                                                                                                             |                    | Sensitivity                     | Specificity | PPV  | NPV |
| <b>3+ p53 positive columnar cells (Automated)</b>                                                                                           | (≥ 10 cells)       | 50%                             | 96%         | 79%  | 86% |
| <b>3+ p53 positive columnar cells (Manual)</b>                                                                                              | (≥ 10 cells)       | 53%                             | 96%         | 80%  | 87% |
| <b>3+ p53 positive glands</b>                                                                                                               | (≥ 1 gland)        | 37%                             | 97%         | 79%  | 83% |
| <b>2+ p53 positive columnar cells</b>                                                                                                       | (≥ 150 cells)      | 63%                             | 70%         | 40%  | 86% |
| <b>3+ p53 positive surface epithelium</b>                                                                                                   | Present/<br>Absent | 7%                              | 100%        | 100% | 77% |
| <b>3+ p53 positive columnar cells (≥ 10)<br/>OR 3+ p53 positive glands (≥ 1)<br/>OR 3+ p53 positive surface epithelium (Present/Absent)</b> |                    | 53%                             | 90%         | 62%  | 86% |

**Supplementary Table 2b: Specificity and sensitivity of p53 immunohistochemistry in NDBE biopsies from patients with long segment BE**

| p53 staining parameters                                                                                                                     | Cut-off points     | BE non-progressor vs progressor |             |      |     |
|---------------------------------------------------------------------------------------------------------------------------------------------|--------------------|---------------------------------|-------------|------|-----|
|                                                                                                                                             |                    | Sensitivity                     | Specificity | PPV  | NPV |
| <b>3+ p53 positive columnar cells (Automated)</b>                                                                                           | (≥ 10 cells)       | 34%                             | 87%         | 81%  | 45% |
| <b>3+ p53 positive columnar cells (manual)</b>                                                                                              | (≥ 10 cells)       | 43%                             | 94%         | 92%  | 50% |
| <b>3+ p53 positive glands</b>                                                                                                               | (≥ 1 gland)        | 23%                             | 98%         | 95%  | 44% |
| <b>2+ p53 positive columnar cells</b>                                                                                                       | (≥ 150 cells)      | 74%                             | 64%         | 77%  | 60% |
| <b>3+ p53 positive surface epithelium</b>                                                                                                   | Present/<br>Absent | 5%                              | 100%        | 100% | 39% |
| <b>3+ p53 positive columnar cells (≥ 10)<br/>OR 3+ p53 positive glands (≥ 1)<br/>OR 3+ p53 positive surface epithelium (Present/Absent)</b> |                    | 46%                             | 79%         | 78%  | 47% |

**Supplementary Table 3: Prediction scoring system for predicting advanced neoplasia:**

| Parameters                            | Categories | Points |
|---------------------------------------|------------|--------|
| <b>Gender</b>                         | Male       | 3      |
|                                       | Female     | 1      |
| <b>Age</b>                            | > 55 years | 3      |
|                                       | ≤ 55 years | 1      |
| <b>Endoscopic length</b>              | Long BE    | 6      |
|                                       | Short BE   | 1      |
| <b>3+ p53 positive columnar cells</b> | ≥ 10 cells | 3      |
|                                       | < 10 cells | 1      |
| <b>3+ p53 positive glands</b>         | ≥ 1 gland  | 6      |
|                                       | No gland   | 1      |

At a score of >10, the sensitivity for the prediction of advanced neoplasia was 84%, the specificity 67%, positive predictive value 66%, and negative predictive value 85%.

**Supplementary Table 4: p53 expression analysis in the secondary cohort (validation portion of the study)**

| <b>p53 staining parameters</b>                                                                                                 | <b>NDBE biopsies from patients who progressed to HGD or EAC (n=30)</b> |
|--------------------------------------------------------------------------------------------------------------------------------|------------------------------------------------------------------------|
| <b>Number of 3+ p53 positive columnar cells (Mean ± SD, Median, Range)</b>                                                     | 68.4 ± 154.8, 6, 0-623                                                 |
| <b>3+ positive p53 columnar cells*</b>                                                                                         |                                                                        |
| < 10 cells                                                                                                                     | 18 (60%)                                                               |
| ≥ 10 cells                                                                                                                     | 12 (40%)                                                               |
| <b>Number of 3+ p53 positive glands (semi-quantitative) (Mean ± SD, Median, Range)</b>                                         | 1.17 ± 4.6, 0, 0-25                                                    |
| <b>Presence of 3+ p53 positive glands</b>                                                                                      |                                                                        |
| ≥ 1 gland                                                                                                                      | 6 (20%)                                                                |
| <b>Negative</b>                                                                                                                | 24 (80%)                                                               |
| <b>3+ p53 positive surface epithelium</b>                                                                                      | 1 (3.3%)                                                               |
| <b>Number of 2+ positive p53 columnar cells (Mean ± SD, Median, Range)</b>                                                     | 531.1 ± 706.0, 330.5, 3-3702                                           |
| <b>2+ p53 positive columnar cells</b>                                                                                          |                                                                        |
| < 150 cells                                                                                                                    | 7 (23.3%)                                                              |
| ≥ 150 cells                                                                                                                    | 23 (76.7%)                                                             |
| <b>3+ p53 positive columnar cells (≥ 10 cells)<br/>OR Any 3+ p53 positive glands<br/>OR 3+ p53 positive surface epithelium</b> | 12 (40%)                                                               |

NDBE= Non-dysplastic Barrett's esophagus, HGD=high grade dysplasia, EAC= esophageal adenocarcinoma

**Supplementary Table 5: Comparison of p53 expression in NDBE biopsies from the prevalent and incident dysplasia from the secondary cohort**

| p53 Staining Parameters                                                                                      | NDBE progressor biopsies (n=30) |                            | P value |
|--------------------------------------------------------------------------------------------------------------|---------------------------------|----------------------------|---------|
|                                                                                                              | Incident dysplasia (n=12)       | Prevalent dysplasia (n=18) |         |
| 3+ p53 positive columnar cells<br>(Mean ± SD, median, range)                                                 | 67 ± 180, 3, 0-623              | 69 ± 142, 6.5, 0-563       | 0.346   |
| 3+ p53 positive columnar cells*                                                                              |                                 |                            |         |
| < 10 cells                                                                                                   | 8 (67%)                         | 10 (55%)                   | 0.709   |
| ≥ 10 cells                                                                                                   | 4 (33%)                         | 8 (44%)                    |         |
| 3+ p53 positive glands (semi-quantitative)<br>(Mean ± SD, median, range)                                     | 2.4 ± 7.2, 0, 0-25              | 0.3 ± 0.7, 0, 0-2          | 0.950   |
| p53 positive glands                                                                                          |                                 |                            |         |
| ≥ 1 3+ positive gland                                                                                        | 2 (17%)                         | 5 (28%)                    | 0.669   |
| No 3+ positive gland                                                                                         | 10 (83%)                        | 13 (72%)                   |         |
| 3+ p53 positive surface epithelium                                                                           | 0                               | 1 (6%)                     | 1.000   |
| 3+ p53 positive columnar cells (≥ 10 cells)<br>OR Any 3+ p53 positive glands<br>OR 3+ p53 surface epithelium | 4 (33%)                         | 8 (44%)                    | 0.709   |
